# Supplementary material for: Comparison between Nasal and Nasopharyngeal Swabs for SARS-CoV-2 Rapid Antigen Detection in an Asymptomatic Population, and Direct Confirmation by RT-PCR from the Residual Buffer
Source: PubMed Central journal article supplement (PMC8849095; doi:10.1128/spectrum.02455-21), 2022-02-16
Supplement: spectrum02455-21_supp_1_seq12.pdf [file spectrum02455-21_supp_1_seq12.pdf]

**Table S1.** Association of weak test bands on the NP Ag-RDT with false positive results, and in patients with false negative NA Ag-RDT.

| NP Ag-RDT band intensity    | True positive<br>NP Ag-RDT* | False positive<br>NP Ag-RDT* | True positive<br>NA Ag-RDT** | False negative<br>NA Ag-RDT** |
|-----------------------------|-----------------------------|------------------------------|------------------------------|-------------------------------|
| Strong                      | 98                          | 0                            | 94                           | 4                             |
| Not reported                | 58                          | 6                            | 70                           | 9                             |
| Weak                        | 19                          | 16                           | 11                           | 8                             |
| <i>P</i> value <sup>#</sup> |                             | <0.0001                      |                              | 0.0002                        |

\*A true positive NP Ag-RDT represents a patient having positive NP Ag-RDT and NAAT results, whereas a false positive is a positive NP Ag-RDT with a negative NAAT. \*\*A true positive NA Ag-RDT represents a patient having positive NA Ag-RDT and NAAT results, whereas a false negative is a positive NAAT in a patient with a negative NA Ag-RDT. Abbreviations: antigen-based rapid diagnostic test (Ag-RDT); nasal (NA), nasopharyngeal (NP); and nucleic acid amplification test (NAAT); residual test buffer (RTB). <sup>#</sup>P-value reported for combined “Strong” and “Not reported” vs. “Weak” given the unquestionable positivity of those that were strong or unremarkable.

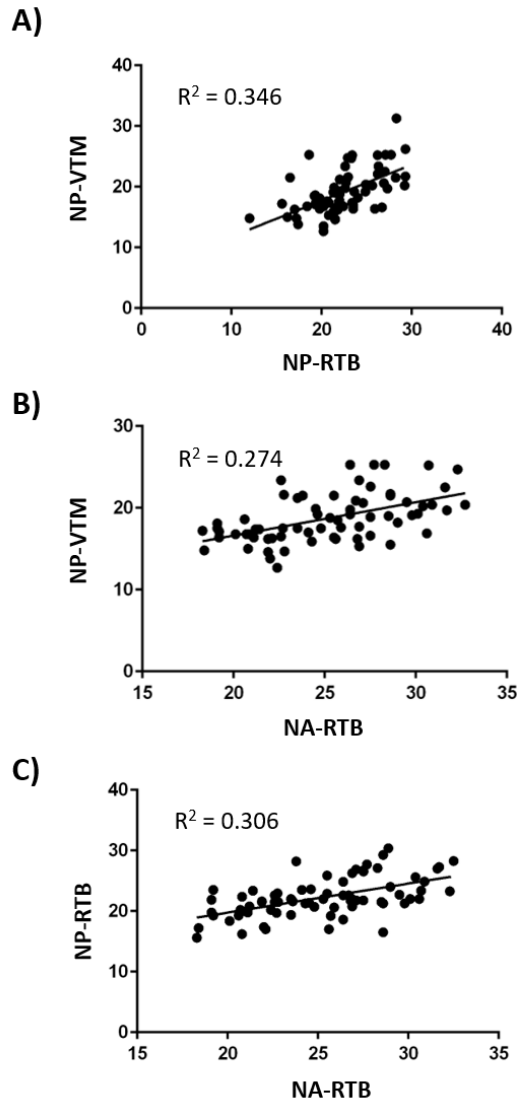

**Figure S1.** Correlation of Ct values between sample types in asymptomatic SARS-CoV-2-positive community dwellers. A) Ct value correlation between NP RTB and NP swabs in VTM; B) Ct value correlation between NA RTB and NP swabs in VTM; and C) Ct value correlation between NP and NA RTB. Abbreviations: cycle threshold (Ct), nasal (NA), nasopharyngeal (NP); and residual test buffer (RTB).
